# Supplementary material
Source: Springer Nature journal article supplement (https://www.springermedizin.de/resource/supplementary/13075_2013_4016_MOESM1_ESM.pdf/9695888)
Supplement: MOESM1 [file 9695888]

**N=242**  
consecutive RA patients who  
consented for blood pressure  
assessment and vascular  
examinations

**Excluded from the analysis**

- 18 due to established cardiovascular disease
- 2 with estimated creatinine clearance < 30 ml/min
- 8 patients without available office BP data

**N= 93**  
Optimal office BP  
 $\leq 129/79$

**N= 121**  
Office BP  
 $> 129/79$

**N= 58**  
Preferred to use home  
BP measurements

**N= 24**  
Preferred to use  
ambulatory 24 hr BP  
measurements

**N= 36**  
Office BP  $> 139/89$   
In this subgroup the “white coat”  
phenomenon may be present but the  
“masked” phenomenon is per se  
excluded

**N= 39**  
Unable to use  
out-of-office BP  
measurements
